# Supplementary material for: Universal Germline Testing of Unselected Cancer Patients Detects Pathogenic Variants Missed by Standard Guidelines without Increasing Healthcare Costs
Source: MDPI journal article supplement (doi:10.3390/cancers13225612), 2021-11-10
Supplement: s1 [file s1]

# Universal Germline Testing of Unselected Cancer Patients Detects Pathogenic variants Missed by Standard Guidelines without Increasing Healthcare Costs

Adrienne T. Perkins, Derrick Haslem, Jessica Goldsberry, Katherine Shortt, Laura Sittig, Sharanya Raghunath, Christopher Giauque, Shawnee Snow, Gail Fulde, Bryce Moulton, David Jones and Lincoln Nadauld

Table S1. Genes included in genetic test.

| Comprehensive 105 Gene Hereditary Cancer Panel |        |                                          |        |       |         |         |     |
|------------------------------------------------|--------|------------------------------------------|--------|-------|---------|---------|-----|
| Inhera Panels                                  |        | Genes Exclusively on Comprehensive Panel |        |       |         |         |     |
| APC                                            | MUTYH  | AIP                                      | DIS3L2 | FANCG | NF2     | SBDS    | XPA |
| ATM                                            | NBN    | ALK                                      | EGFR   | FANCI | NSD1    | SDHA    | XPC |
| BARD1                                          | NF1    | BAP1                                     | ERCC2  | FANCL | PDE4D   | SDHAF2  |     |
| BLM                                            | PALB2  | BUB1B                                    | ERCC3  | FANCM | PHOX2B  | SDHB    |     |
| BMPR1A                                         | PMS2   | CASR                                     | ERCC4  | FH    | PMS1    | SDHC    |     |
| BRCA1                                          | POLD1  | CDC73                                    | ERCC5  | FLCN  | POLE    | SDHD    |     |
| BRCA2                                          | PTEN   | CDK4                                     | EXT1   | GATA2 | PPM1D   | SLX4    |     |
| BRIP1                                          | RAD50  | CDKN1B                                   | EXT2   | GNAS  | PRF1    | SMARCB1 |     |
| CDH1                                           | RAD51C | CDKN1C                                   | EZH2   | GPC3  | PRKAR1A | SUFU    |     |
| CHEK2                                          | RAD51D | CDKN2A                                   | FANCA  | HNF1A | PTCH1   | TMEM127 |     |
| EPCAM                                          | SMAD4  | CEBPA                                    | FANCB  | HRAS  | RB1     | TSC1    |     |
| MLH1                                           | STK11  | CEP57                                    | FANCC  | KIT   | RECQL4  | TSC2    |     |
| MRE11A                                         | TP53   | CYLD                                     | FANCD2 | MAX   | RET     | VHL     |     |
| MSH2                                           |        | DDB2                                     | FANCE  | MEN1  | RHBDF2  | WRN     |     |
| MSH6                                           |        | DICER1                                   | FANCF  | MET   | RUNX1   | WT1     |     |

Bold text indicates genes analyzed for CNVs.

Table S2. Characterization of patients identified to harbor pathogenic germline variants (PGV).

| Patient # | Sex    | Age at Dx | Diagnosis     | Stage      | Family History of Cancer | Testing Eligibility | Gene with PGV <sup>a</sup> | Variant Type <sup>b</sup> | P/LP <sup>c</sup> | Gene Exclusive to Expanded Panel | Clinically Actionable | Gene Function                          |
|-----------|--------|-----------|---------------|------------|--------------------------|---------------------|----------------------------|---------------------------|-------------------|----------------------------------|-----------------------|----------------------------------------|
| 1         | Female | 55        | Brain Cancer  | Stage IV   | No                       | Ineligible          | FANCD2                     | deletion                  | LP                | Yes                              | No                    | DNA Repair                             |
| 2         | Female | 53        | Breast Cancer | Stage 0    | Yes                      | Ineligible          | ATM                        | SNP                       | P                 | No                               | Actionable            | DNA Repair                             |
| 3         | Female | 71        | Breast Cancer | Stage I    | Yes                      | Eligible            | PALB2                      | insertion                 | P                 | No                               | Actionable            | DNA Repair                             |
| 4         | Female | 75        | Breast Cancer | Stage IA   | Yes                      | Eligible            | BRIP1, NF1                 | SNP, insertion            | P, P              | No, No                           | Actionable            | Actionable, DNA Repair, Cell Signaling |
| 5         | Female | 45        | Breast Cancer | Stage IA   | Unknown                  | Eligible            | FANCC                      | SNP                       | P                 | Yes                              | No                    | DNA Repair                             |
| 6         | Female | 52        | Breast Cancer | Stage IA   | Yes                      | Eligible            | ATM                        | SNP                       | LP                | No                               | Actionable            | DNA Repair                             |
| 7         | Female | 63        | Breast Cancer | Stage IA   | Yes                      | Ineligible          | MUTYH                      | SNP                       | P                 | No                               | No                    | DNA Repair                             |
| 8         | Female | 51        | Breast Cancer | Stage IA   | No                       | Ineligible          | SLX4                       | SNP                       | P                 | Yes                              | No                    | DNA Repair                             |
| 9         | Female | 67        | Breast Cancer | Stage IA   | Yes                      | Ineligible          | FANCM                      | SNP                       | P                 | Yes                              | No                    | DNA Repair                             |
| 10        | Female | 60        | Breast Cancer | Stage IIA  | Yes                      | Eligible            | FANCC                      | intronic splice site SNP  | P                 | Yes                              | No                    | DNA Repair                             |
| 11        | Female | 80        | Breast Cancer | Stage IIA  | Yes                      | Ineligible          | FANCD2                     | intronic splice site SNP  | P                 | Yes                              | No                    | DNA Repair                             |
| 12        | Female | 65        | Breast Cancer | Stage IIA  | Yes                      | Ineligible          | MUTYH                      | SNP                       | P                 | No                               | No                    | DNA Repair                             |
| 13        | Female | 31        | Breast Cancer | Stage IIIC | No                       | Eligible            | BRCA1                      | deletion                  | P                 | No                               | Actionable            | DNA Repair                             |

|    |        |    |                           |            |         |            |             |                          |      |          |                |                                    |
|----|--------|----|---------------------------|------------|---------|------------|-------------|--------------------------|------|----------|----------------|------------------------------------|
| 14 | Female | 64 | Cancer of unknown primary | Stage IV   | Unknown | Eligible   | CHEK2       | SNP                      | LP   | No       | Actionable     | Cell Growth & Division             |
| 15 | Female | 60 | Colon Cancer              | Stage I    | No      | Ineligible | MSH6        | SNP                      | P    | No       | Actionable     | DNA Repair                         |
| 16 | Male   | 44 | Colon Cancer              | Stage I    | Unknown | Ineligible | MUTYH       | intronic splice site SNP | P    | No       | No             | DNA Repair                         |
| 17 | Male   | 92 | Colon Cancer              | Stage II   | No      | Ineligible | FANCA       | deletion                 | P    | Yes      | No             | DNA Repair                         |
| 18 | Female | 66 | Colon Cancer              | Stage IIA  | Yes     | Eligible   | MSH6        | insertion                | LP   | No       | Actionable     | DNA Repair                         |
| 19 | Male   | 70 | Colon Cancer              | Stage IIIB | No      | Ineligible | MSH6        | insertion                | P    | No       | Actionable     | DNA Repair                         |
| 20 | Male   | 64 | Colon Cancer              | Stage IV   | Yes     | Ineligible | RAD51C      | intronic SNP             | P    | No       | Actionable     | DNA Repair                         |
| 21 | Female | 59 | GI Tract Cancer           | Stage III  | Yes     | Ineligible | ATM         | SNP                      | P    | No       | Actionable     | DNA Repair                         |
| 22 | Female | 58 | Head & Neck Cancer        | Stage I    | No      | Ineligible | FANCM       | SNP                      | P    | Yes      | No             | DNA Repair                         |
| 23 | Male   | 63 | Head & Neck Cancer        | Stage I    | Yes     | Ineligible | MUTYH       | SNP                      | P    | No       | No             | DNA Repair                         |
| 24 | Female | 70 | Kidney Cancer             | Stage III  | Yes     | Ineligible | ERCC4       | SNP                      | LP   | Yes      | No             | DNA Repair                         |
| 25 | Male   | 77 | Kidney Cancer             | Stage IV   | Yes     | Eligible   | BRCA2       | deletion                 | LP   | No       | Actionable     | DNA Repair                         |
| 26 | Female | 72 | Lung Cancer               | Stage III  | Yes     | Ineligible | MUTYH       | SNP                      | P    | No       | No             | DNA Repair                         |
| 27 | Male   | 66 | Lung Cancer               | Stage III  | Unknown | Ineligible | CHEK2       | deletion                 | P    | No       | Actionable     | Cell Growth & Division             |
| 28 | Female | 59 | Lung Cancer               | Stage IIIA | Unknown | Eligible   | BRCA2       | deletion                 | P    | No       | Actionable     | DNA Repair                         |
| 29 | Female | 80 | Lung Cancer               | Stage IIIB | No      | Ineligible | ERCC2       | SNP                      | P    | Yes      | No             | DNA Repair                         |
| 30 | Female | 69 | Lung Cancer               | Stage IV   | Yes     | Eligible   | ATM         | intronic SNP             | P    | No       | Actionable     | DNA Repair                         |
| 31 | Male   | 81 | Lung Cancer               | Stage IV   | No      | Ineligible | MSH6        | intronic insertion       | P    | No       | Actionable     | DNA Repair                         |
| 32 | Female | 73 | Ovarian Cancer            | Stage III  | Unknown | Eligible   | ERCC3       | SNP                      | P    | Yes      | No             | DNA Repair                         |
| 33 | Female | 51 | Ovarian Cancer            | Stage III  | Yes     | Eligible   | BRCA2       | deletion                 | LP   | No       | Actionable     | DNA Repair                         |
| 34 | Female | 56 | Ovarian Cancer            | unknown    | Yes     | Eligible   | BRCA1       | SNP                      | P    | No       | Actionable     | DNA Repair                         |
| 35 | Female | 82 | Pancreatic Cancer         | Stage IA   | Yes     | Eligible   | ERCC3       | deletion                 | LP   | Yes      | No             | DNA Repair                         |
| 36 | Female | 69 | Pancreatic Cancer         | Stage IIB  | No      | Eligible   | BRCA1       | deletion                 | P    | No       | Actionable     | DNA Repair                         |
| 37 | Male   | 82 | Prostate Cancer           | Stage IIIC | Yes     | Eligible   | CHEK2       | SNP                      | LP   | No       | Actionable     | Cell Growth & Division             |
| 38 | Male   | 77 | Prostate Cancer           | Stage IV   | Yes     | Eligible   | CHEK2       | deletion                 | P    | No       | Actionable     | Cell Growth & Division             |
| 39 | Male   | 79 | Prostate Cancer           | unknown    | Unknown | Eligible   | PALB2       | insertion                | P    | No       | Actionable     | DNA Repair                         |
| 40 | Male   | 69 | Skin Cancer               | Stage IV   | Yes     | Eligible   | CHEK2       | deletion                 | P    | No       | Actionable     | Cell Growth & Division             |
| 41 | Male   | 70 | Skin Cancer               | Stage IV   | Yes     | Ineligible | MUTYH       | SNP                      | P    | No       | No             | DNA Repair                         |
| 42 | Male   | 55 | Splenic Cancer            | Stage II   | Unknown | Eligible   | SDHB, BUB1B | insertion, SNP           | P, P | Yes, Yes | Actionable, No | Metabolism, Cell Growth & Division |
| 43 | Male   | 88 | Urinary Tract Cancer      | Stage II   | No      | Ineligible | SDHAF2      | intronic SNP             | LP   | Yes      | Actionable     | Metabolism                         |
| 44 | Male   | 69 | Urinary Tract Cancer      | Stage IV   | Yes     | Ineligible | MUTYH       | SNP                      | P    | No       | No             | DNA Repair                         |

<sup>a</sup> All patients were heterozygous for all variants; <sup>\*</sup>SNP = single nucleotide polymorphism; <sup>+</sup>P/LP = pathogenic, likely-pathogenic.
